# Evaluate Attention Disorders and Neurological Functioning Across the Lifespan.

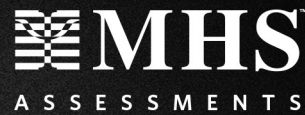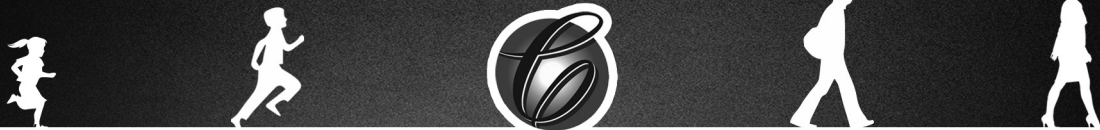

## CONNERS K-CPT 2™

Conners Kiddie Continuous  
Performance Test 2<sup>nd</sup> Edition™

## CONNERS CPT 3™

Conners Continuous  
Performance Test 3<sup>rd</sup> Edition™

## CONNERS CATA®

Conners Continuous  
Auditory Test of Attention®

For Ages 4 to 7

7.5 minutes to complete and  
uses pictures of objects familiar  
to young children.

MHS.com/KCPT2

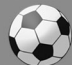

For Ages 8+

A task-oriented computerized  
assessment of **attention-related  
problems.**

MHS.com/CPT3

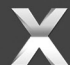

For Ages 8+

Assesses **auditory processing**  
and **attention-related problems.**

MHS.com/CATA

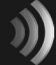

Now available! Develop a comprehensive evaluation using the gold standard in CPT assessment with the Conners CPT 3™, an auditory test of attention with the Conners CATA®, and the Conners K-CPT 2™ now with an expanded age range.

- Easy interpretation with new reports offering clear visuals & summaries.
- Trusted results with the most representative CPT normative samples collected.
- New scores were developed to help pinpoint the exact nature of the child or adult's attention problems.

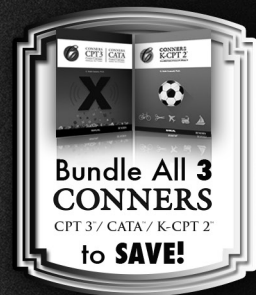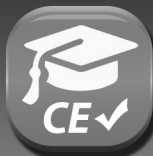

Earn Continuing Education (CE) Credits with the Conners CPT 3/CATA/K-CPT 2.

It is easy to earn CE credits quickly and online. Just study the manual, pass the online questionnaire, and a certificate is created for you! **Learn more at MHS.com/CE**

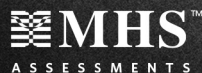

**Multi-Health Systems Inc.**

USA Tel: 1.800.456.3003 / CAN Tel: 1.800.268.6011  
mhs.com • customerservice@mhs.com
