# The Journal of Neuropsychiatry

## and Clinical Neurosciences

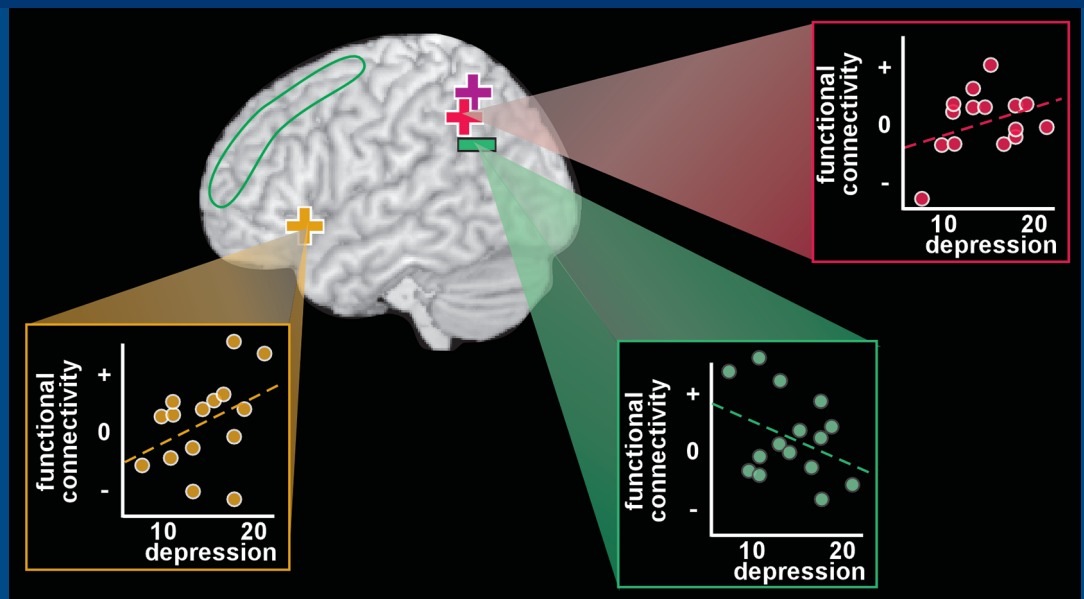

Poststroke Depression: Contributions  
From Network Science

Epidemiology and Natural History of  
Psychiatric Disorders After TBI

Bridging the Great Divide: What Can  
Neurology Learn From Psychiatry?

Six Landmark Case Reports Essential  
for Neuropsychiatric Literacy

Delirium Phenotype by Age and Sex in a  
Pooled Data Set of Adult Patients
